# Supplementary material for: MUSiCC: a marker genes based framework for metagenomic normalization and accurate profiling of gene abundances in the microbiome
Source: PubMed Central journal article supplement (PMC4391136; doi:10.1186/s13059-015-0610-8), 2015-03-25

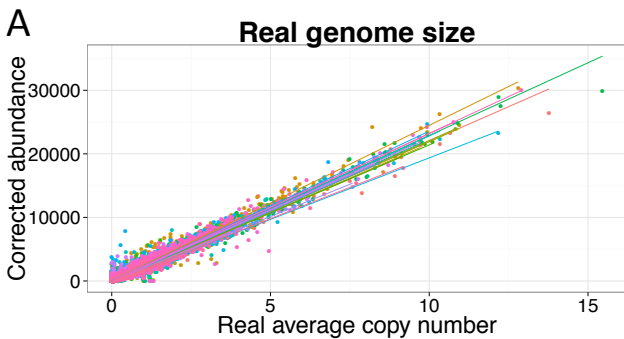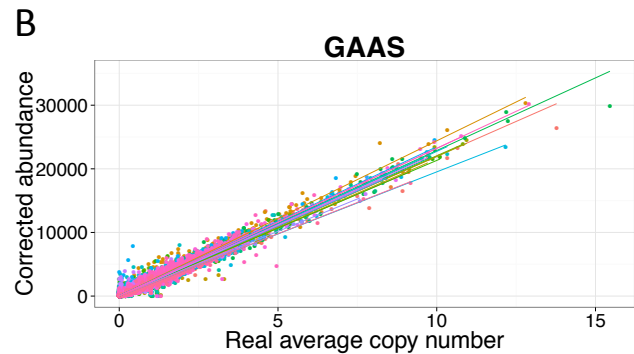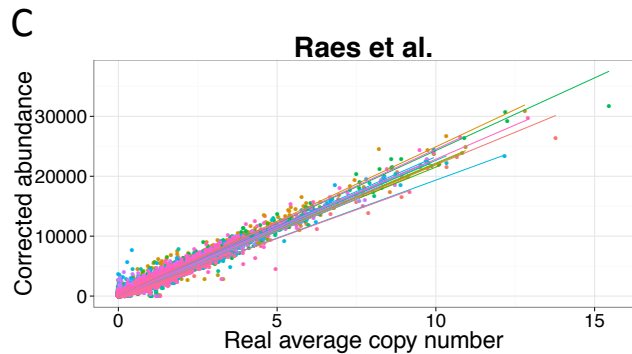

Supplement: 13059_2015_610_MOESM11_ESM.pdf [file 13059_2015_610_MOESM11_ESM.pdf]
